# Supplementary material for: Retrospective study of cancer types in different ethnic groups and genders at Karachi
Source: PubMed Central journal article supplement (PMC3625419; doi:10.1186/2193-1801-2-118), 2013-03-19

# Ranking of Cancers in Sindhi Females

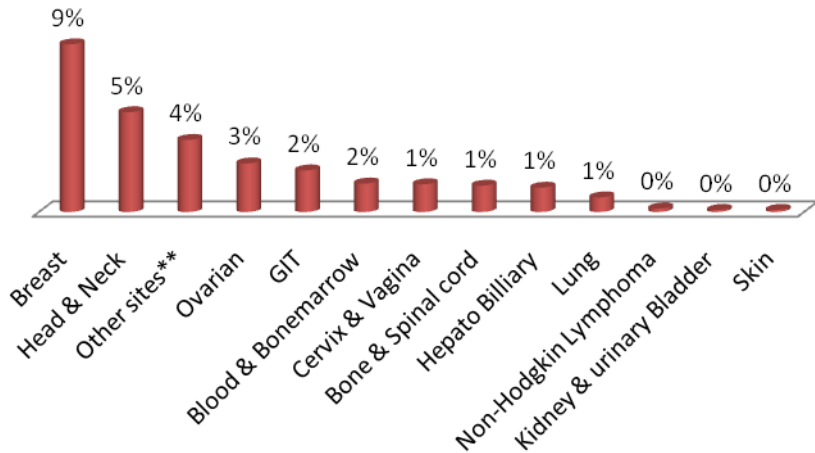

Supplement: 40064_2012_201_MOESM2_ESM.pdf [file 40064_2012_201_MOESM2_ESM.pdf]
